# Supplementary material
Source: publisher figshare collection journal article supplement (https://karger.figshare.com/ndownloader/files/13806293)
Supplement: Supplementary file 1 [file 13806293]

|  |  | AKI  (N=53) | Non-AKI  (N=105) | P value |
| --- | --- | --- | --- | --- |
| Age | years | 71 [63, 78] | 72 [62, 79] | 1.00 |
| Female | N (%) | 16 (30) | 35 (33) | 0.72 |
| Body Mass Index | kg/m2 | 22.6 [20.1, 25.2] | 22.3 [20.0, 24.9] | 0.48 |
| Physical status before ICU admission | |
| Walking | N (%) | 30 (57) | 69 (61) | 0.84 |
| Reason of ICU admission |  |  |  |  |
| Non-surgical | N (%) | 22 (42) | 56 (53) | 0.006* |
| APACHE II |  | 25 [20, 32] | 21 [17, 25] | 0.003* |
| Length of ICU stay | days | 11 [9, 19] | 12 [9, 16] | 0.65 |
| Use of RRT | N (%) | 29 (55) | 16 (15) | <0.001* |
| Rehabilitation during ICU | N (%) | 46 (87) | 75 (71) | 0.045* |
| Good physical status at ICU dis. | N (%) | 21 (40) | 23 (22) | 0.04* |
| Calorie at Day 3 | kcal/kg/day | 6.7 [1.8, 11.3] | 9.4 [5.2, 16.6] | 0.02* |
| Protein and Amino acid at Day 3 | g/kg/day | 0 [0, 0.4] | 0.3 [0, 0.6] | 0.001* |
| Calorie at Day 7 | kcal/kg/day | 15.4 [10.4, 22.1] | 16.8 [10.0, 23.7] | 0.56 |
| Protein and Amino acid at Day 7 | g/kg/day | 0.5 [0.3, 0.9] | 0.6 [0.3, 0.9] | 0.40 |
| Calorie at ICU dis. | kcal/kg/day | 16.8 [11.6, 26.6] | 17.1 [8.3, 24.3] | 0.45 |
| Protein and Amino acid at ICU dis. | g/kg/day | 0.7 [0.2, 1.0] | 0.6 [0.2, 0.9] | 0.31 |

Supplemental Table 1. Clinical data in Acute kidney injury (AKI) patients and non-AKI patients (after excluding patients capable of oral intake during ICU admission)

*: p < 0.05, Good: good physical status at ICU discharge (end sitting, sitting on wheelchair, walking)

N: number, ICU: intensive care unit, APACHE: Acute Physiology and Chronic Health Evaluation, RRT: Renal replacement therapy, ICU dis: ICU discharge
